# Supplementary material for: Evolutional carrier mobility and power factor of two-dimensional tin telluride due to quantum size effects
Source: Royal Society of Chemistry journal article supplement (doi:10.1039/c9tc06611j), 2020-01-01
Supplement: c9tc06611j1.pdf [file c9tc06611j1.pdf]

Supplemental material for

## Evolutional Carrier Mobility and Power Factor of Two-Dimensional Tin Telluride due to Quantum Size Effects

Yu Li,<sup>a</sup> Teng Ding,<sup>a</sup> David K. Sang,<sup>a,b</sup> Mengnan Wu,<sup>a</sup> Junqin Li,<sup>a</sup> Cong Wang,<sup>b</sup>  
Fusheng Liu,<sup>\*a</sup> Han Zhang<sup>\*b</sup> and Heping Xie<sup>a</sup>

<sup>a</sup> Shenzhen Key Laboratory of Special Functional Materials, Shenzhen Engineering Laboratory for Advanced Technology of Ceramics, Guangdong Research Center for Interfacial Engineering of Functional Materials, Guangdong Provincial Key Laboratory of Deep Earth Sciences and Geothermal Energy Exploitation and Utilization, College of Materials Science and Engineering, Shenzhen University, Shenzhen 518060, China

<sup>b</sup> Key Laboratory of Optoelectronic Devices and Systems of Ministry of Education and Guangdong Province, College of Optoelectronic Engineering, Shenzhen University, Shenzhen, 518060, China.

\*Correspondence: Han Zhang ([h Zhang@szu.edu.cn](mailto:h Zhang@szu.edu.cn)), Fusheng Liu ([fliu@szu.edu.cn](mailto:fliu@szu.edu.cn))

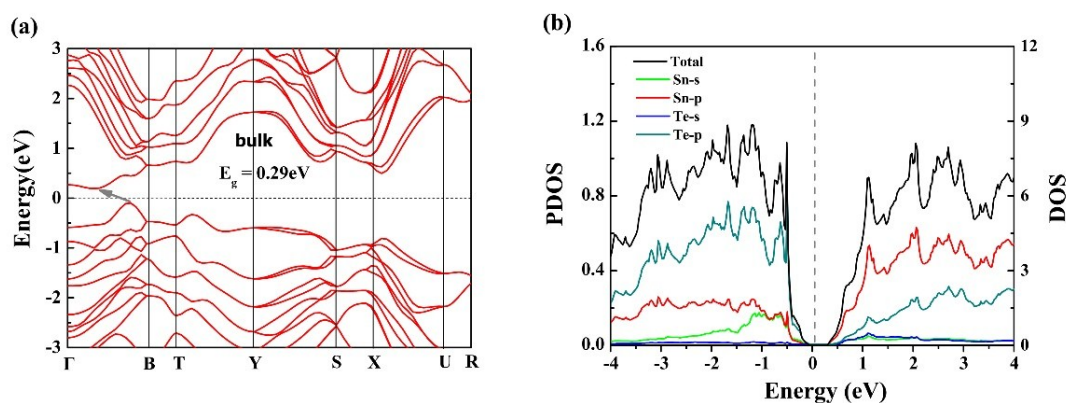

**Figure S1.** (a) Electronic band structure and (b) total density of states (TDOS) and the partial density of state (PDOS) of bulk SnTe extracted from optPBE-vdw functional.

(a)

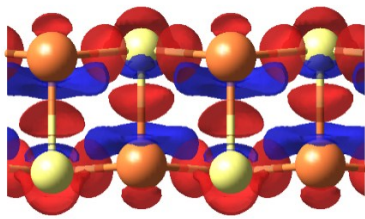

(b)

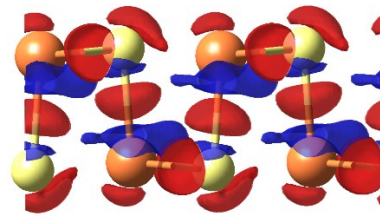

Monolayer

(c)

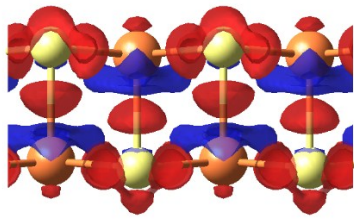

(d)

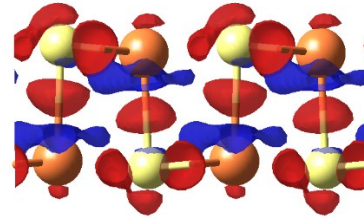

Bilayer

(e)

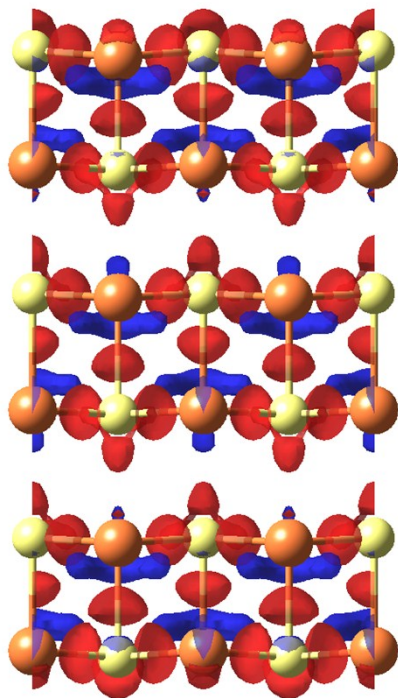

(f)

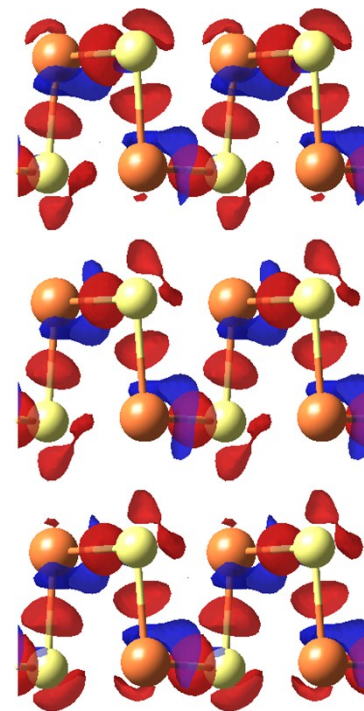

Triple layer

(g)

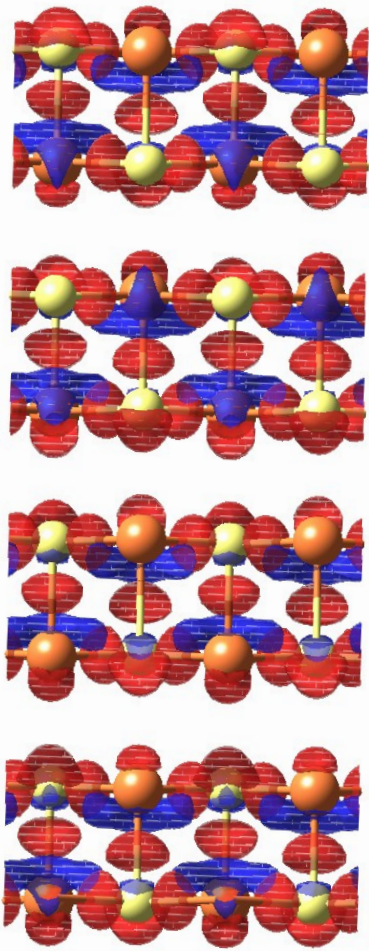

(h)

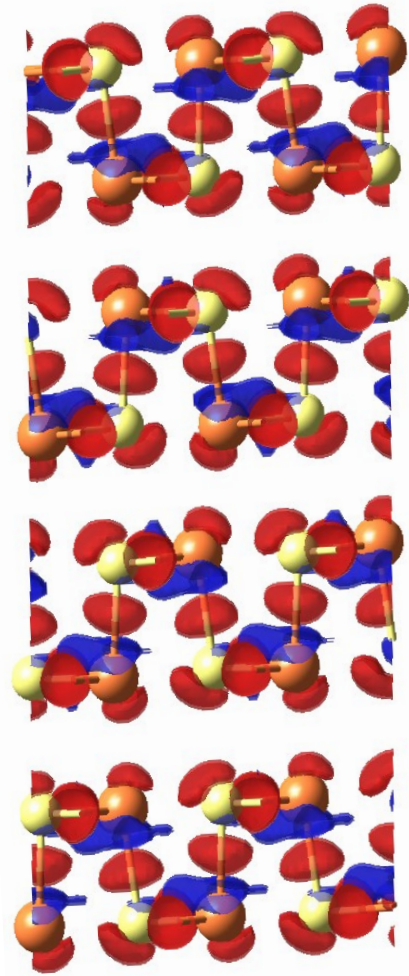

Four layer

(i)

(j)

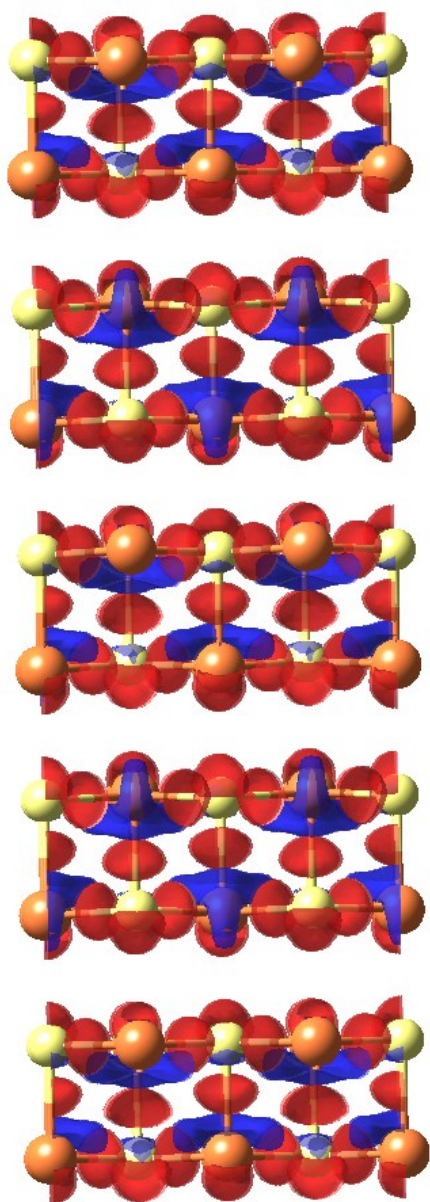

(k)

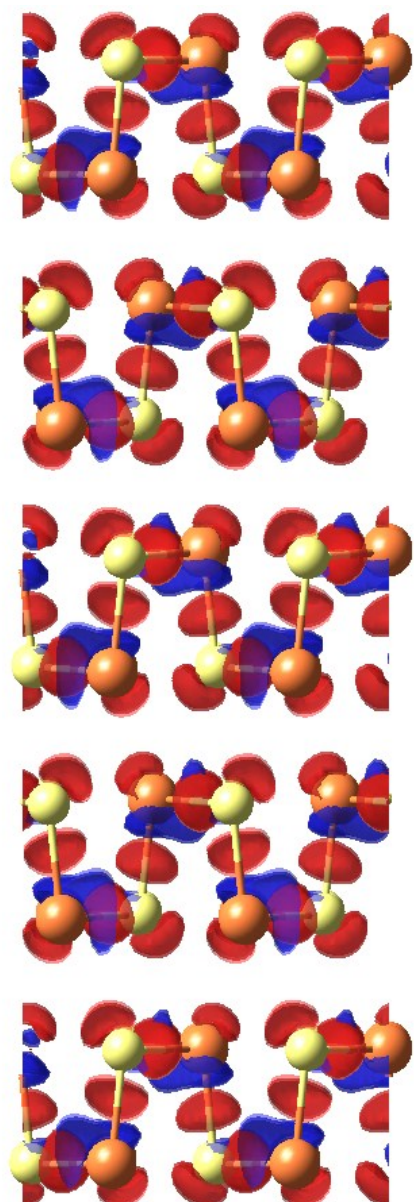

(l)

Five layer

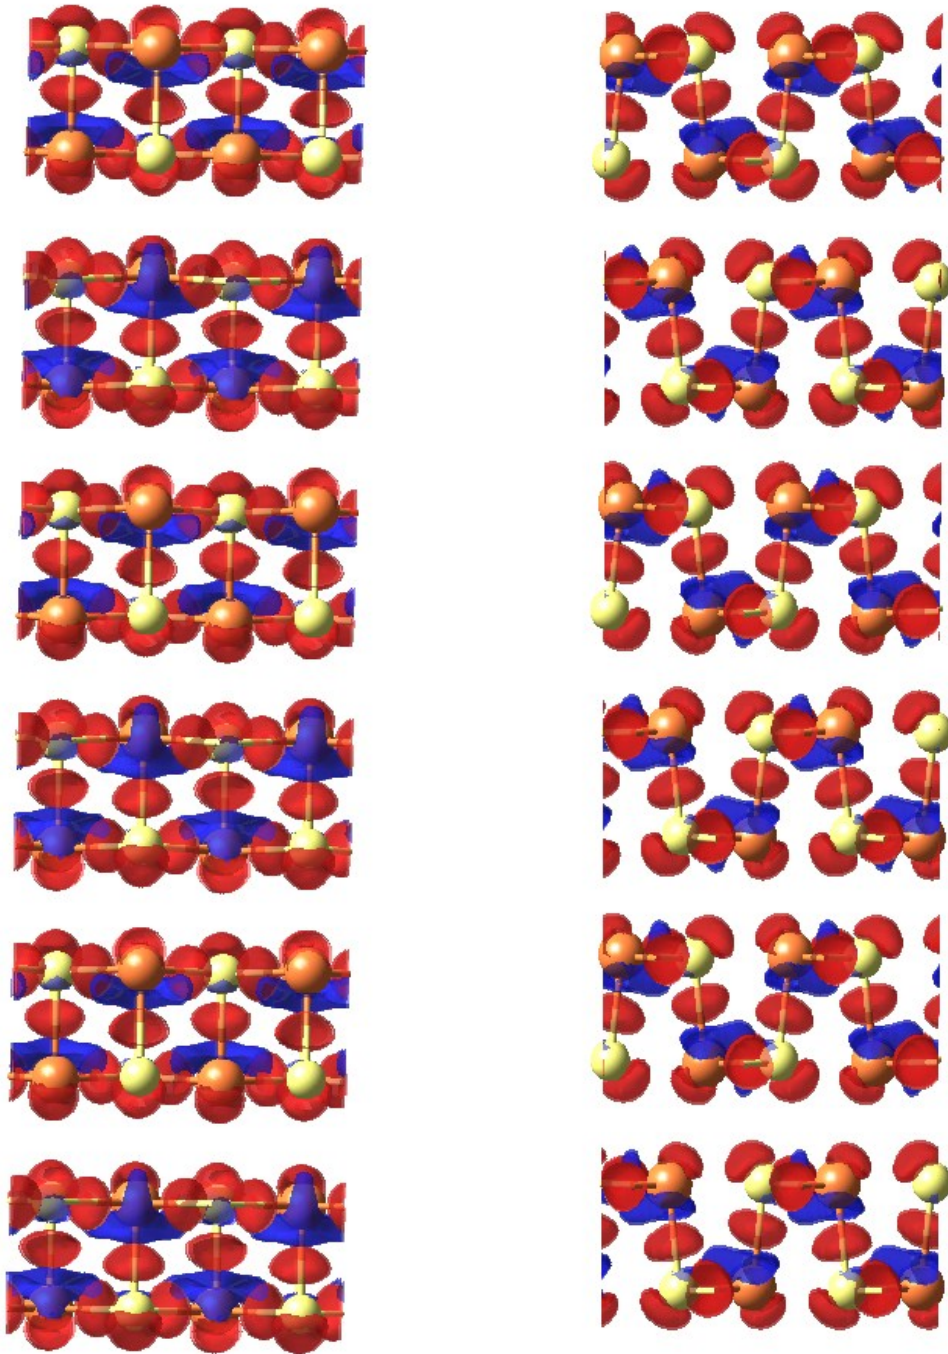

Six layer

**Figure S2.** (a)-(l) The side views of calculated difference charge density distribution for the 1L-6 L SnTe , with a constant density of  $0.02 /-0.02 \text{ e}/\text{\AA}^3$  for the electrons accumulation and depletion respectively.

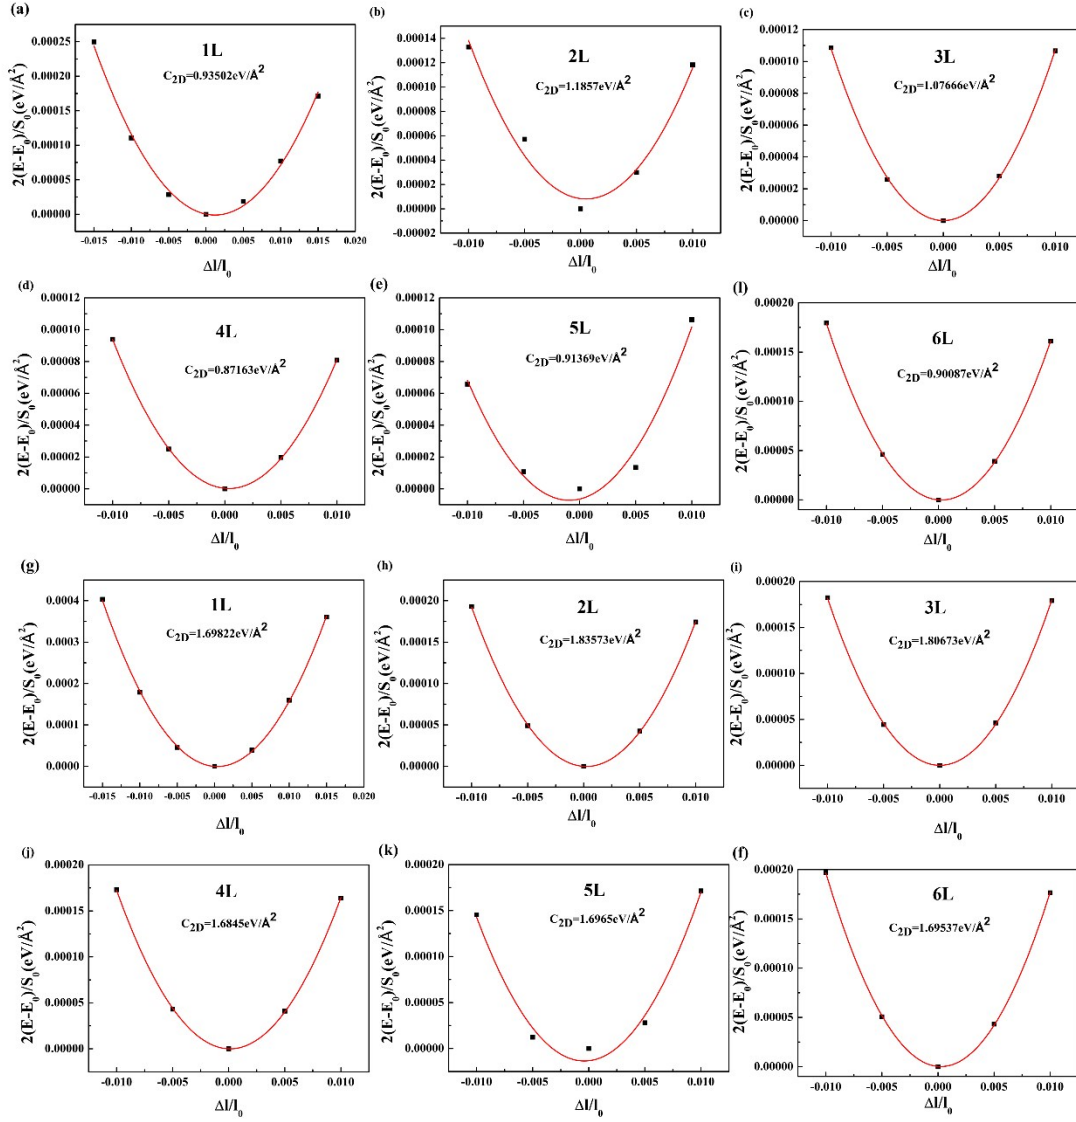

**Figure S3.** Calculated elastic constants ( $C_{2D}$ ) by fitting the energy difference to quadratic polynomial functions for monolayer (1 L) and few layer (2 L, 3 L, 4 L, 5 L and 6 L) SnTe along armchair (a-f) and zigzag (g-l) directions.

### Armchair direction

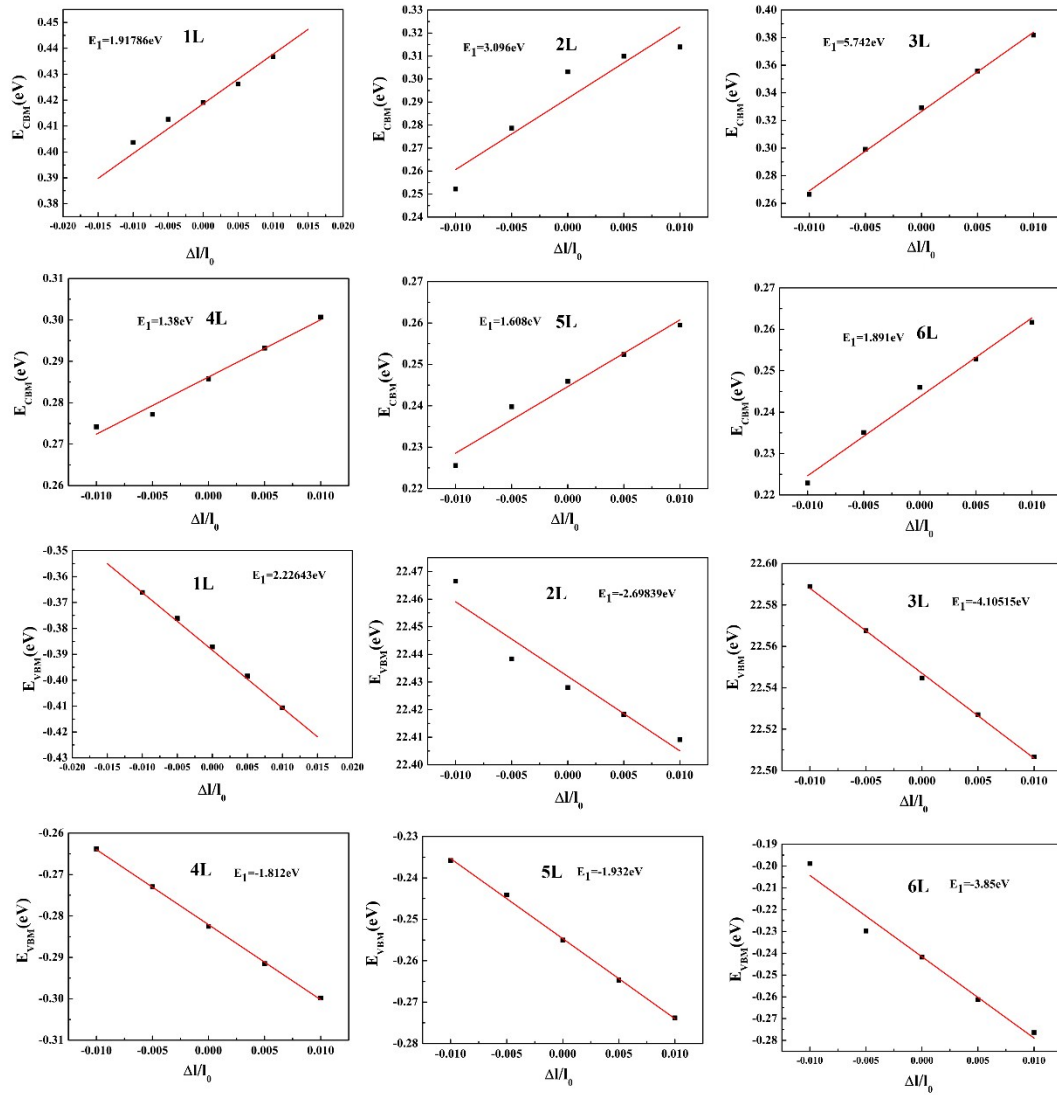

**Figure S4.** Calculated deformation constants ( $E_1$ ) for n- and *p*-type SnTe monolayer (1 L) and few-layer (1 L, 2 L, 3 L, 4 L, 5 L and 6 L) along armchair direction

### Zigzag direction

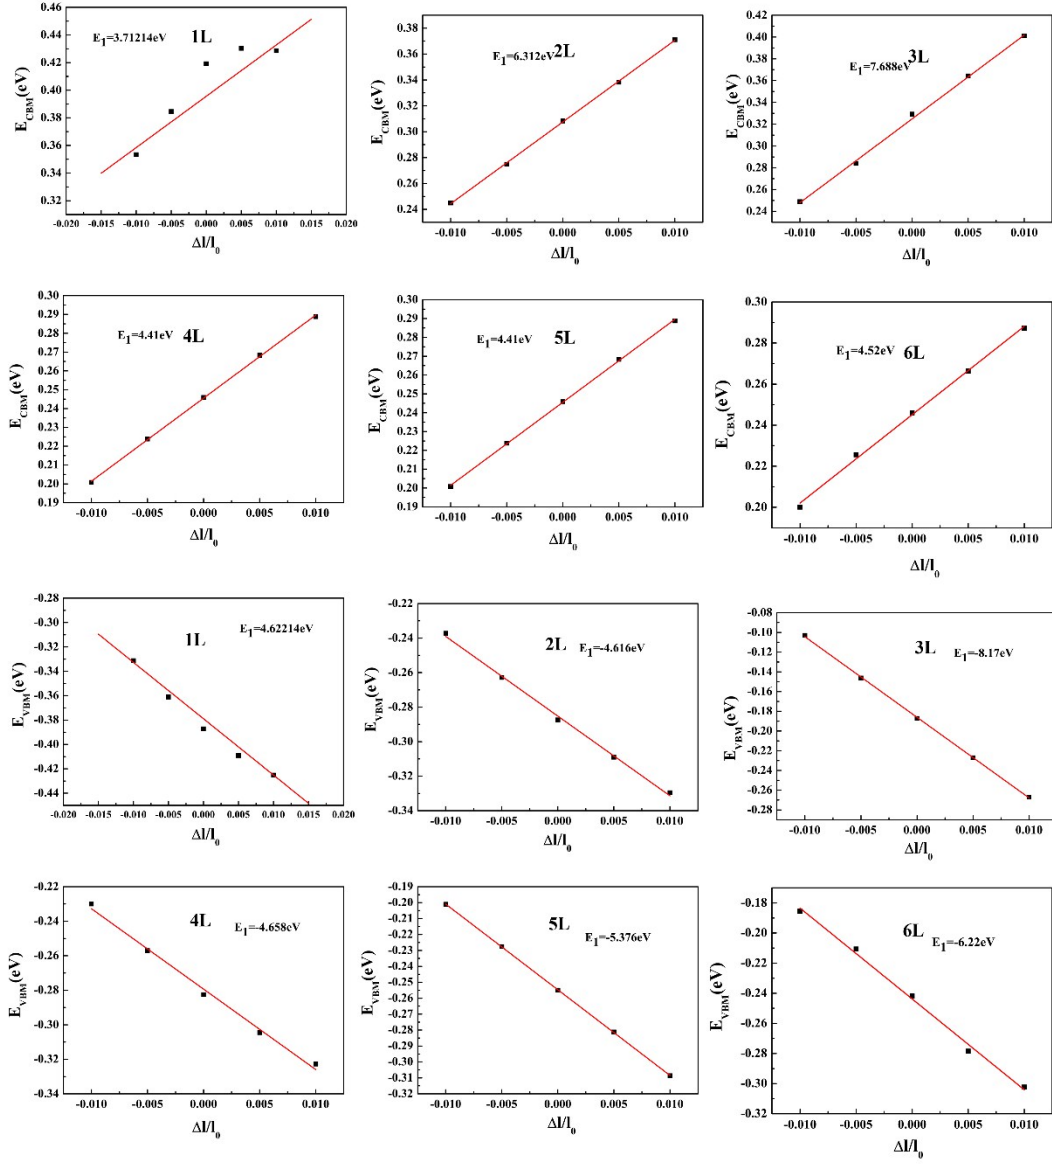

**Figure S5.** Calculated deformation constants ( $E_1$ ) for n- and *p*-type SnTe monolayer (1 L) and few-layer (2 L, 3 L, 4 L, 5 L and 6 L) along zigzag direction.



**Table S1.** Deformation potential constant ( $E_1$ ), elastic constant ( $C_{2D}$ ), effective mass ( $m^*$ ), carrier mobility ( $\mu$ ) and relaxation time ( $\tau$ ) at 300 K, 500 K, 700 K and 900 K, in the armchair and zigzag directions of the 1-6 L SnTe.

**1L**

| Carrier type | Direction | $C_{2D}$<br>( $J/m^2$ ) | $E_1$<br>(eV) | $m^*$<br>( $m_0$ ) | T = 300K               |        | T = 500K               |        | T = 700K               |        | T = 900K               |        |
|--------------|-----------|-------------------------|---------------|--------------------|------------------------|--------|------------------------|--------|------------------------|--------|------------------------|--------|
|              |           |                         |               |                    | $\mu$                  | $\tau$ | $\mu$                  | $\tau$ | $\mu$                  | $\tau$ | $\mu$                  | $\tau$ |
|              |           |                         |               |                    | ( $cm^2V^{-1}s^{-1}$ ) | (fs)   |
| hole         | Armchair  | 15.0                    | 1.9           | 0.31               | 1037                   | 183    | 622                    | 109    | 444                    | 78     | 346                    | 61     |
|              | Zigzag    | 27.2                    | 3.7           | 0.23               | 677                    | 89     | 406                    | 53     | 290                    | 38     | 226                    | 30     |
| electron     | Armchair  | 15.0                    | 2.2           | 0.23               | 1866                   | 244    | 1119                   | 146    | 799                    | 104    | 622                    | 81     |
|              | Zigzag    | 27.2                    | 4.6           | 0.10               | 1809                   | 103    | 1085                   | 62     | 775                    | 44     | 603                    | 34     |

**2L**

| Carrier type | Direction | $C_{2D}$<br>( $J/m^2$ ) | $E_1$<br>(eV) | $m^*$<br>( $m_0$ ) | T = 300K               |        | T = 500K               |        | T = 700K               |        | T = 900K               |        |
|--------------|-----------|-------------------------|---------------|--------------------|------------------------|--------|------------------------|--------|------------------------|--------|------------------------|--------|
|              |           |                         |               |                    | $\mu$                  | $\tau$ | $\mu$                  | $\tau$ | $\mu$                  | $\tau$ | $\mu$                  | $\tau$ |
|              |           |                         |               |                    | ( $cm^2V^{-1}s^{-1}$ ) | (fs)   |
| hole         | Armchair  | 19.0                    | 3.1           | 0.26               | 560                    | 83     | 336                    | 50     | 240                    | 36     | 187                    | 28     |
|              | Zigzag    | 29.4                    | 6.3           | 0.32               | 170                    | 31     | 102                    | 19     | 73                     | 13     | 56                     | 10     |
| electron     | Armchair  | 19.0                    | 2.7           | 0.20               | 1983                   | 226    | 1189                   | 135    | 850                    | 96     | 661                    | 75     |
|              | Zigzag    | 29.4                    | 4.6           | 0.10               | 2100                   | 119    | 1260                   | 72     | 900                    | 51     | 700                    | 40     |

### 3L

| Carrier type | Direction | $C_{2D}$<br>( $J/m^2$ ) | $E_1$<br>(eV) | $m^*$<br>( $m_0$ ) | T = 300K               |        | T = 500K               |        | T = 700K               |        | T = 900K               |        |
|--------------|-----------|-------------------------|---------------|--------------------|------------------------|--------|------------------------|--------|------------------------|--------|------------------------|--------|
|              |           |                         |               |                    | $\mu$                  | $\tau$ | $\mu$                  | $\tau$ | $\mu$                  | $\tau$ | $\mu$                  | $\tau$ |
|              |           |                         |               |                    | ( $cm^2V^{-1}s^{-1}$ ) | (fs)   |
| hole         | Armchair  | 17.2                    | 5.7           | 0.41               | 140                    | 33     | 84                     | 20     | 60                     | 14     | 47                     | 11     |
|              | Zigzag    | 28.9                    | 7.7           | 0.10               | 378                    | 31     | 227                    | 18     | 162                    | 13     | 126                    | 10     |
| electron     | Armchair  | 17.2                    | 4.1           | 0.28               | 406                    | 65     | 243                    | 39     | 174                    | 28     | 135                    | 22     |
|              | Zigzag    | 28.9                    | 8.2           | 0.13               | 371                    | 27     | 223                    | 16     | 15                     | 12     | 124                    | 9      |

### 4L

| Carrier type | Direction | $C_{2D}$<br>( $J/m^2$ ) | $E_1$<br>(eV) | $m^*$<br>( $m_0$ ) | T = 300K               |        | T = 500K               |        | T = 700K               |        | T = 900K               |        |
|--------------|-----------|-------------------------|---------------|--------------------|------------------------|--------|------------------------|--------|------------------------|--------|------------------------|--------|
|              |           |                         |               |                    | $\mu$                  | $\tau$ | $\mu$                  | $\tau$ | $\mu$                  | $\tau$ | $\mu$                  | $\tau$ |
|              |           |                         |               |                    | ( $cm^2V^{-1}s^{-1}$ ) | (fs)   |
| hole         | Armchair  | 14.0                    | 1.4           | 2.40               | 35                     | 31     | 21                     | 18     | 15                     | 13     | 12                     | 10     |
|              | Zigzag    | 27.0                    | 4.3           | 3.50               | 5                      | 6      | 3                      | 4      | 2                      | 3      | 2                      | 2      |
| electron     | Armchair  | 14.0                    | 3.6           | 0.22               | 741                    | 58     | 444                    | 35     | 31                     | 25     | 247                    | 19     |
|              | Zigzag    | 27.0                    | 4.7           | 0.22               | 719                    | 57     | 431                    | 34     | 308                    | 24     | 240                    | 19     |

5L

| Carrier type | Direction | $C_{2D}$<br>( $J/m^2$ ) | $E_1$<br>(eV) | $m^*$<br>( $m_0$ ) | T = 300K               |        | T = 500K               |        | T = 700K               |        | T = 900K               |        |
|--------------|-----------|-------------------------|---------------|--------------------|------------------------|--------|------------------------|--------|------------------------|--------|------------------------|--------|
|              |           |                         |               |                    | $\mu$                  | $\tau$ | $\mu$                  | $\tau$ | $\mu$                  | $\tau$ | $\mu$                  | $\tau$ |
|              |           |                         |               |                    | ( $cm^2V^{-1}s^{-1}$ ) | (fs)   |
| hole         | Armchair  | 14.6                    | 1.6           | 1.18               | 48                     | 32     | 29                     | 19     | 21                     | 14     | 16                     | 11     |
|              | Zigzag    | 27.1                    | 4.4           | 2.6                | 6                      | 8      | 3                      | 5      | 2                      | 3      | 2                      | 3      |
| electron     | Armchair  | 14.6                    | 3.7           | 0.24               | 406                    | 55     | 244                    | 33     | 174                    | 24     | 135                    | 18     |
|              | Zigzag    | 27.1                    | 5.4           | 0.22               | 396                    | 49     | 237                    | 30     | 169                    | 21     | 132                    | 16     |

6L

| Carrier type | Direction | $C_{2D}$<br>( $J/m^2$ ) | $E_1$<br>(eV) | $m^*$<br>( $m_0$ ) | T = 300K               |        | T = 500K               |        | T = 700K               |        | T = 900K               |        |
|--------------|-----------|-------------------------|---------------|--------------------|------------------------|--------|------------------------|--------|------------------------|--------|------------------------|--------|
|              |           |                         |               |                    | $\mu$                  | $\tau$ | $\mu$                  | $\tau$ | $\mu$                  | $\tau$ | $\mu$                  | $\tau$ |
|              |           |                         |               |                    | ( $cm^2V^{-1}s^{-1}$ ) | (fs)   |
| hole         | Armchair  | 14.4                    | 1.9           | 1.10               | 41                     | 26     | 25                     | 15     | 18                     | 11     | 14                     | 9      |
|              | Zigzag    | 27.1                    | 4.5           | 3.30               | 5                      | 9      | 3                      | 5      | 2                      | 4      | 2                      | 3      |
| electron     | Armchair  | 14.4                    | 3.9           | 0.22               | 392                    | 49     | 235                    | 29     | 168                    | 21     | 131                    | 16     |
|              | Zigzag    | 27.1                    | 6.2           | 0.26               | 240                    | 35     | 144                    | 21     | 103                    | 15     | 80                     | 12     |

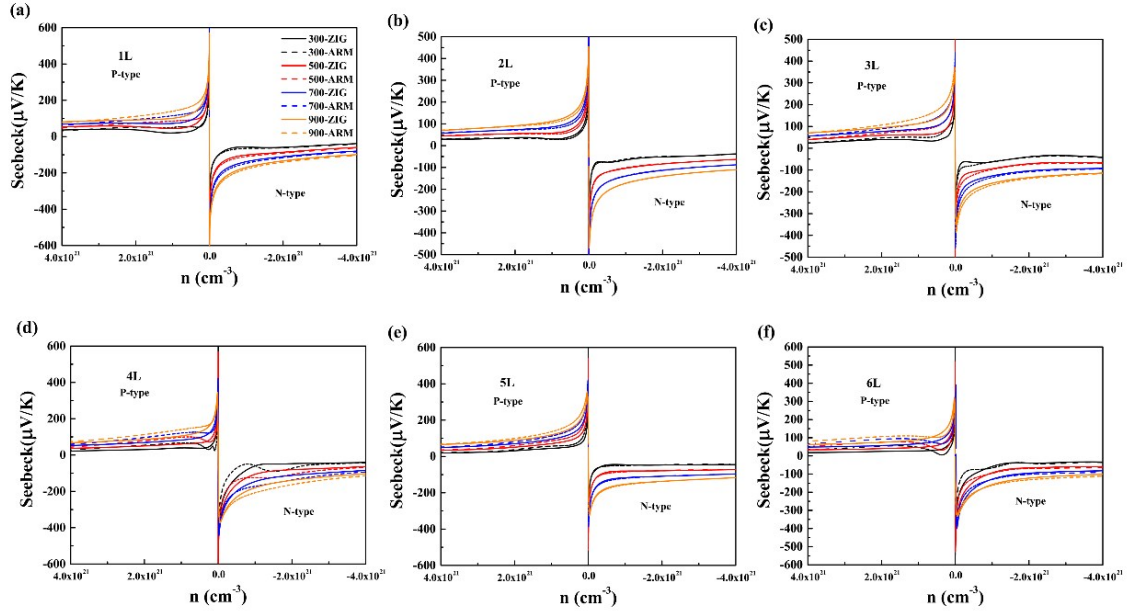

**Figure S6.** Seebeck coefficient ( $S$ ) of monolayer (1 L) and few-layer (2 L, 3 L, 4 L, 5 L and 6 L) of SnTe in the armchair (broken line) and zigzag (solid line) directions, (a)-(f) at 300 K (black), 500 K (red), 700 K (blue) and 900 K (orange).

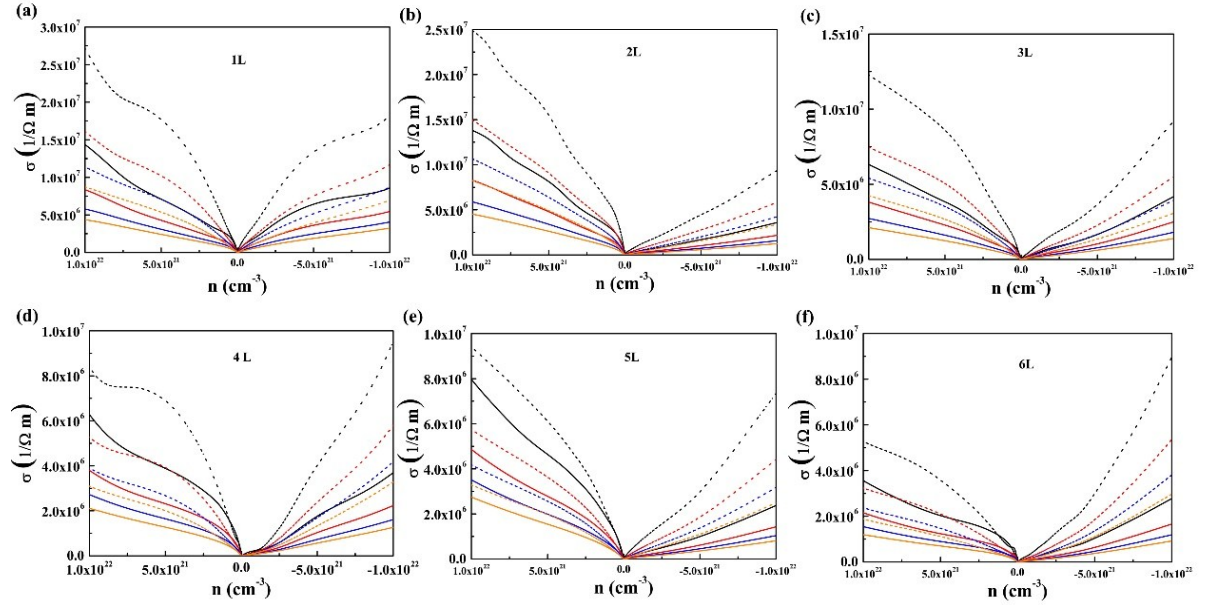

**Figure S7.** Electrical conductivity ( $\sigma$ ) of monolayer (1 L) and few-layer (2 L, 3 L, 4 L, 5 L and 6 L) of SnTe in the armchair (broken line) and zigzag (solid line) directions, (a)-(f) at 300 K (black), 500 K (red), 700 K (blue) and 900 K (orange).

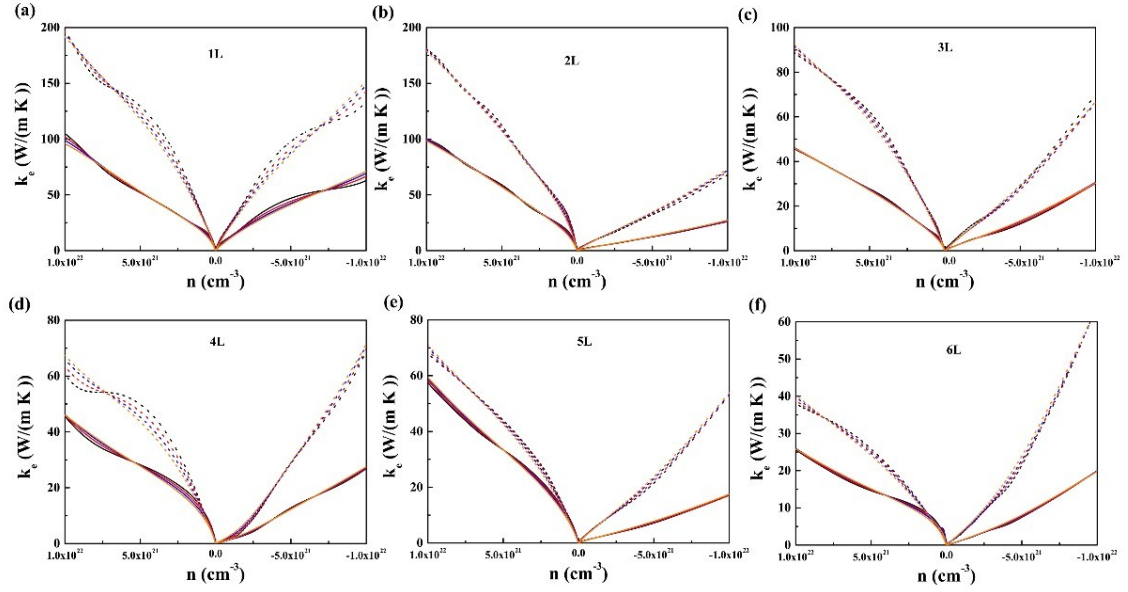

**Figure S8.** Electrical thermal conductivity of monolayer (1 L) and few-layer (2 L, 3 L, 4 L, 5 L and 6 L) of SnTe in the armchair (broken line) and zigzag (solid line) directions, (a)-(f) at 300K (black), 500K (red), 700K (blue) and 900K (orange).

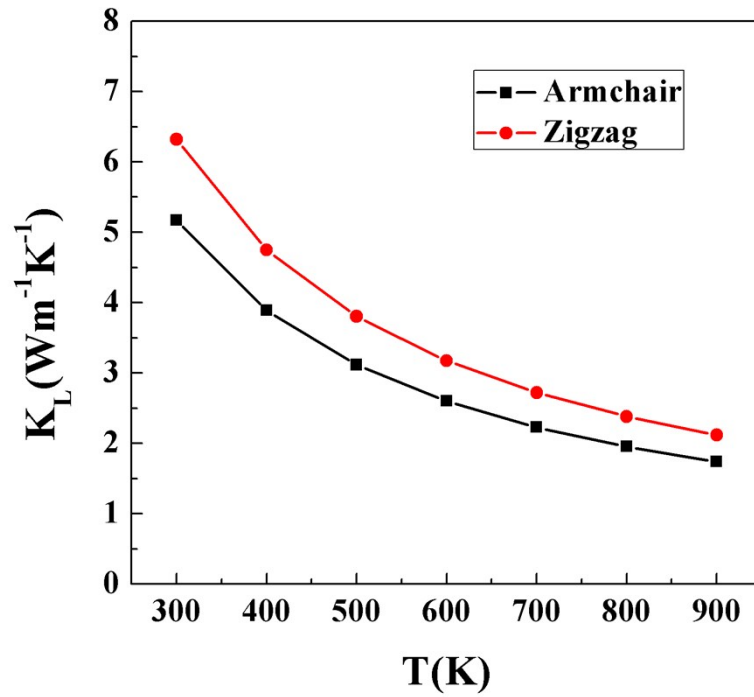

**Figure S9.** The calculated directional lattice thermal conductivity of monolayer SnTe at various temperatures. <sup>1</sup>

**Table S2** The calculated directional lattice thermal conductivity values of monolayer SnTe at 300K, 500K, 700K and 900K, respectively.

| $K_L(\text{Wm}^{-1}\text{K}^{-1})$ | T = 300K | T = 500K | T = 700K | T = 900K |
|------------------------------------|----------|----------|----------|----------|
| Armchair                           | 5.17     | 3.12     | 2.23     | 1.74     |
| Zigzag                             | 6.32     | 3.80     | 2.72     | 2.12     |

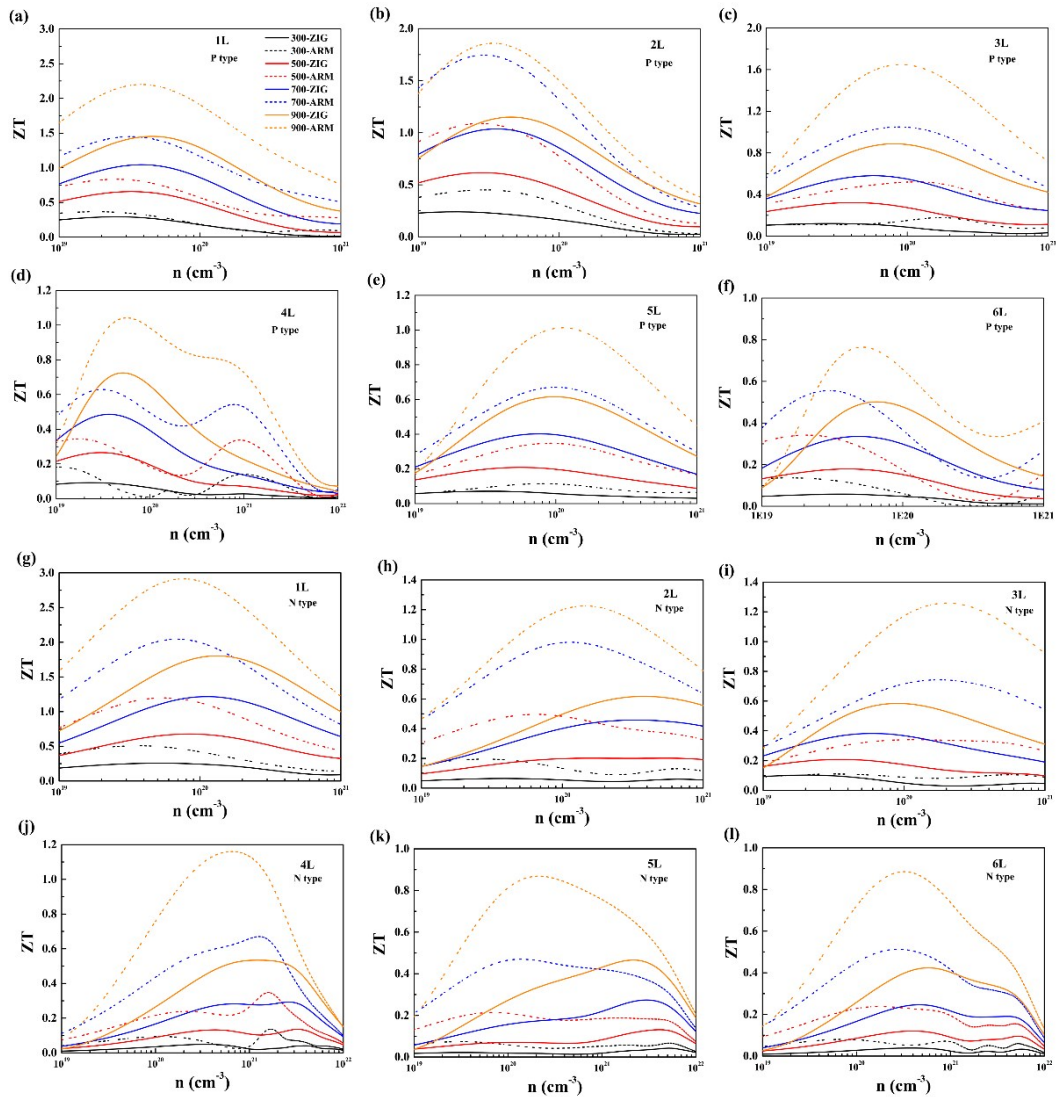

**Figure S10.** Thermoelectric figure-of-merit (ZT) of monolayer (1 L) and few-layer (2 L, 3 L, 4 L, 5 L and 6 L) of SnTe in the armchair (broken line) and zigzag (solid line) directions, at 300 K (black), 500 K (red), 700 K (blue) and 900 K (orange) for *n*-type (a)-(f) and *p*-type (g)-(l).

## Reference

1. Y. Li, M. N. Wu, T. Ding, K. Ma, F. S. Liu, W. Q. Ao and J. Q. Li, *Appl. Phys. Lett.*, 2019, **114**, 5.
